# Supplementary material
Source: HighWire-hosted journal article supplement (http://molpharm.aspetjournals.org/highwire/filestream/76655/field_highwire_adjunct_files/0/Figures.pdf)

## Supplemental Figure 1A

Time-course of S1P and CYM-5442 for stimulating p42/p44 MAPK activation in CHO-K1 cells transiently transfected with WT human S1P1. Plotted on the same graph is the effect of S1P incubation in mock-transfected CHO-K1 cells.

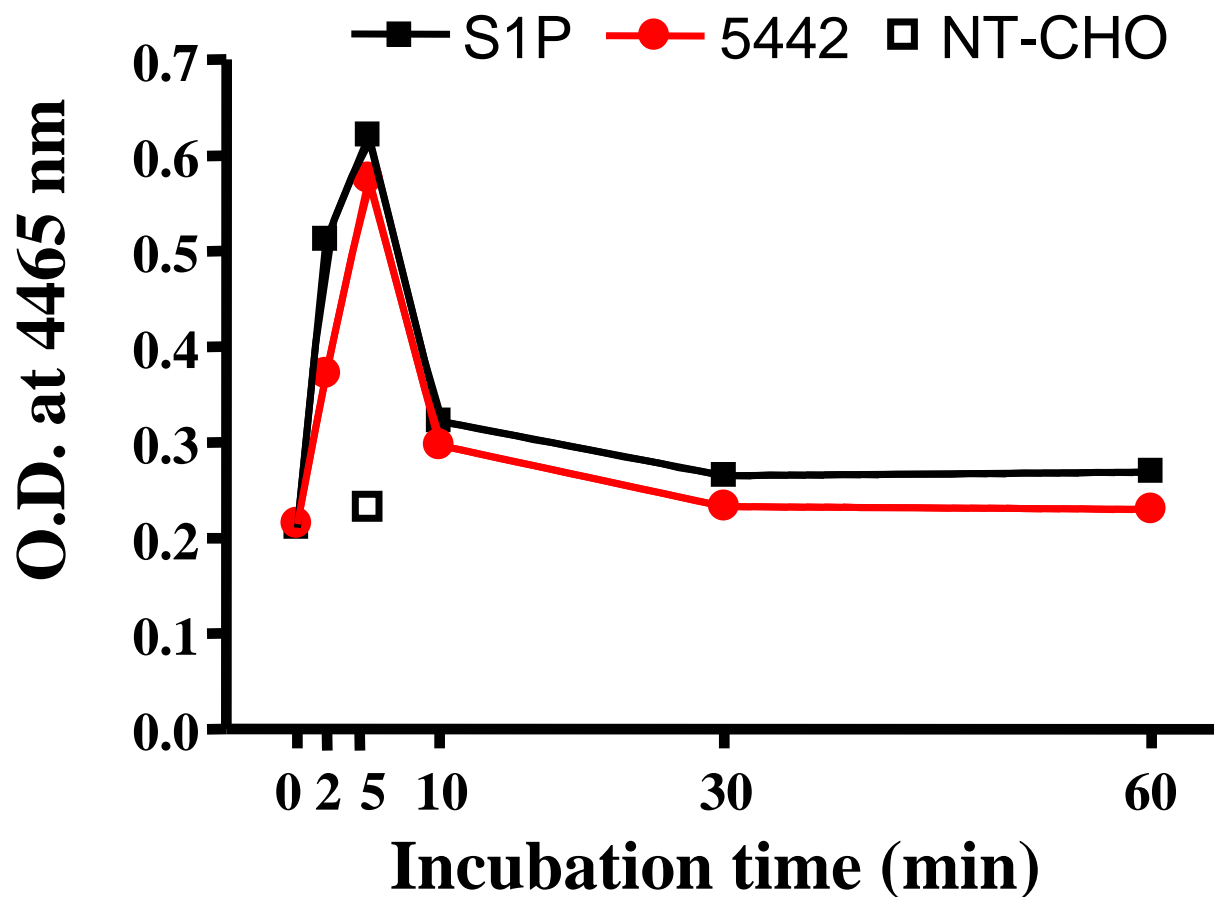

## Supplemental Figure 1B

S1P and CYM-5442-mediated p42/p44 MAPK activation is blocked by the MEK1 inhibitor U0126 (1  $\mu$ M, 30 min).

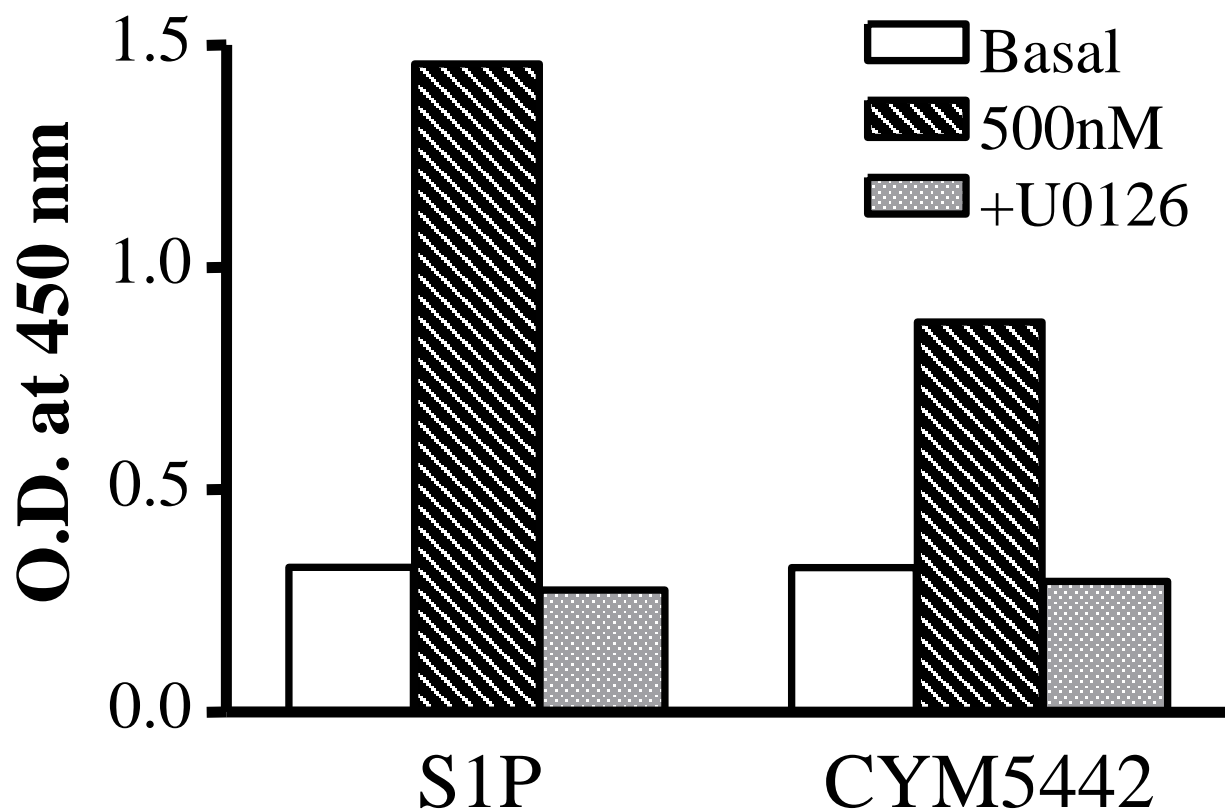

Supplement: Figures.pdf [file Figures.pdf]
